# Supplementary material
Source: PubMed Central journal article supplement (PMC3359141)
Supplement: NIHMS314260-supplement-01.pdf [file NIHMS314260-supplement-01.pdf]

## SUPPLEMENTARY ONLINE DATA

# Domain structure elucidation of human decorin glycosaminoglycans

Tatiana N. LAREMORE\*, Mellisa LY\*, Zhenqing ZHANG\*, Kemal SOLAKYILDIRIM\*, Scott A. McCALLUM†, Richard T. OWENS‡ and Robert J. LINHARDT\*†§||<sup>1</sup>

\*Department of Chemistry and Chemical Biology, Rensselaer Polytechnic Institute, 110 8th Street, Troy, NY 12180, U.S.A., †Center for Biotechnology and Interdisciplinary Studies, Rensselaer Polytechnic Institute, 110 8th Street, Troy, NY 12180, U.S.A., ‡Life Cell Corporation, One Millennium Way, Branchburg, NJ 08876, U.S.A., §Department of Biology, Rensselaer Polytechnic Institute, 110 8th Street, Troy, NY 12180, U.S.A., and ||Department of Chemical and Biological Engineering, Rensselaer Polytechnic Institute, 110 8th Street, Troy, NY 12180, U.S.A.

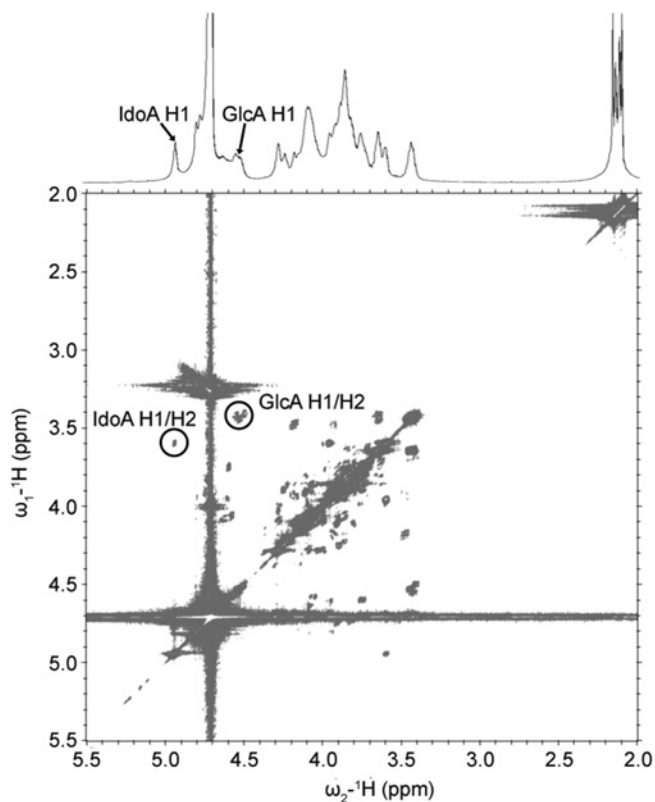

**Figure S1** NMR analysis of decorin peptidoglycan (one-dimensional <sup>1</sup>H-NMR and two-dimensional H-H COSY)

Received 27 May 2010/6 July 2010; accepted 13 August 2010  
 Published as BJ Immediate Publication 13 August 2010, doi:10.1042/BJ20100788

<sup>1</sup> To whom correspondence should be addressed (email linhar@rpi.edu).
